# Supplementary material for: Identification of Two Independent COL5A1 Variants in Dogs with Ehlers–Danlos Syndrome
Source: PubMed Central journal article supplement (PMC6826881; doi:10.3390/genes10100731), 2019-09-21
Supplement: genes-10-00731-s001.pdf [file genes-10-00731-s001.pdf]

**Table S1.** COL5A1:c.4711G>A genotypes of 493 dogs from 66 different dog breeds.

| Breed Abbreviation | Breed                      | Number of dogs | Genotype |     |     |
|--------------------|----------------------------|----------------|----------|-----|-----|
|                    |                            |                | G/G      | A/G | A/A |
| AI                 | Akita Inu                  | 8              | 8        | 0   | 0   |
| AC                 | Australian Cattle Dog      | 8              | 8        | 0   | 0   |
| AD                 | Alpine Dachsbracke         | 8              | 8        | 0   | 0   |
| AP                 | Appenzeller Mountain Dog   | 8              | 8        | 0   | 0   |
| AK                 | Australian Kelpie          | 7              | 7        | 0   | 0   |
| AU                 | Australian Shepherd        | 8              | 8        | 0   | 0   |
| BA                 | Barbet                     | 8              | 8        | 0   | 0   |
| BO                 | Barsoi                     | 7              | 7        | 0   | 0   |
| BG                 | Bavarian Mountain Hound    | 6              | 6        | 0   | 0   |
| BE                 | Beagle                     | 8              | 8        | 0   | 0   |
| BD                 | Bearded Collie             | 8              | 8        | 0   | 0   |
| BS                 | Bernese Mountain Dog       | 7              | 7        | 0   | 0   |
| BC                 | Border Collie              | 8              | 8        | 0   | 0   |
| BN                 | Boston Terrier             | 7              | 7        | 0   | 0   |
| CE                 | Cairn Terrier              | 8              | 8        | 0   | 0   |
| CS                 | Cão da Serra de Aires      | 8              | 8        | 0   | 0   |
| CC                 | Chinese Crested Dog        | 8              | 8        | 0   | 0   |
| CW                 | Chow Chow                  | 7              | 7        | 0   | 0   |
| CR                 | Curly Coated Retriever     | 7              | 7        | 0   | 0   |
| TW                 | Czechoslovakian Wolfdog    | 8              | 8        | 0   | 0   |
| DH                 | Dachshund                  | 8              | 8        | 0   | 0   |
| DW                 | Deutscher Wachtelhund      | 7              | 7        | 0   | 0   |
| EL                 | Elo                        | 8              | 8        | 0   | 0   |
| EN                 | Entlebucher Mountain Dog   | 8              | 8        | 0   | 0   |
| EU                 | Eurasian Dog               | 8              | 8        | 0   | 0   |
| FR                 | Flat Coated Retriever      | 6              | 6        | 0   | 0   |
| FB                 | French Bulldog             | 8              | 8        | 0   | 0   |
| DS                 | German Shepherd            | 6              | 6        | 0   | 0   |
| KS                 | German Spitz (Kleinspitz)  | 5              | 5        | 0   | 0   |
| MS                 | German Spitz (Mittelspitz) | 7              | 7        | 0   | 0   |
| GW                 | German Wirehaired Pointer  | 7              | 7        | 0   | 0   |
| RS                 | Giant Schnauzer            | 8              | 8        | 0   | 0   |
| GR                 | Golden Retriever           | 6              | 6        | 0   | 0   |
| DD                 | Great Dane                 | 8              | 8        | 0   | 0   |
| GY                 | Greyhound                  | 8              | 8        | 0   | 0   |
| GD                 | Groenendael                | 4              | 4        | 0   | 0   |
| JT                 | Hunting Terrier            | 6              | 6        | 0   | 0   |
| IT                 | Irish Terrier              | 8              | 8        | 0   | 0   |
| JR                 | Jack Russell Terrier       | 8              | 8        | 0   | 0   |
| WS                 | Keeshound (Wolfsspitz)     | 7              | 7        | 0   | 0   |
| KF                 | Kromfohrländer             | 8              | 8        | 0   | 0   |
| LA                 | Labrador Retriever         | 8              | 8        | 0   | 0   |
| LR                 | Lagotto romagnolo          | 8              | 8        | 0   | 0   |
| LN                 | Landseer                   | 8              | 8        | 0   | 0   |
| LB                 | Leonberger                 | 8              | 8        | 0   | 0   |
| MA                 | Malinois                   | 8              | 8        | 0   | 0   |
| MB                 | Miniature Bullterrier      | 6              | 6        | 0   | 0   |
| RP                 | Miniature Pinscher         | 8              | 8        | 0   | 0   |
| NF                 | Newfoundland               | 8              | 8        | 0   | 0   |
| NW                 | Norwich Terrier            | 8              | 8        | 0   | 0   |

|    |                                    |            |            |          |          |
|----|------------------------------------|------------|------------|----------|----------|
| NR | Nova Scotia Duck Tolling Retriever | 8          | 8          | 0        | 0        |
| PE | Perro de Agua Españõl              | 8          | 8          | 0        | 0        |
| PO | Polski Owczarek Nizinny            | 7          | 7          | 0        | 0        |
| ZS | Pomeranian (Zwergspitz)            | 7          | 7          | 0        | 0        |
| GP | Poodle (Grosspudel)                | 8          | 8          | 0        | 0        |
| RR | Rhodesian Ridgeback                | 8          | 8          | 0        | 0        |
| SB | Saint Bernard                      | 8          | 8          | 0        | 0        |
| NS | Schapendoes                        | 8          | 8          | 0        | 0        |
| SC | Scottish Terrier                   | 7          | 7          | 0        | 0        |
| SY | Siberian Husky                     | 7          | 7          | 0        | 0        |
| SS | Shetland Sheepdog                  | 8          | 8          | 0        | 0        |
| SG | Sloughi                            | 8          | 8          | 0        | 0        |
| TT | Tibetan Terrier                    | 7          | 7          | 0        | 0        |
| WW | West Highland White Terrier        | 8          | 8          | 0        | 0        |
| WH | Whippet                            | 7          | 7          | 0        | 0        |
| BB | White Swiss Shepherd               | 8          | 8          | 0        | 0        |
|    | <b>Total</b>                       | <b>493</b> | <b>493</b> | <b>0</b> | <b>0</b> |
